# Supplementary material
Source: PubMed Central journal article supplement (PMC8639639)
Supplement: NIHMS1740893-supplement-1.pdf [file NIHMS1740893-supplement-1.pdf]

**Table S1. Antibodies used for phenotyping and sorting of myeloma cells**

| <b>specificity</b> | <b>fluorochrome</b> | <b>clone</b>  | <b>manufacturer</b> | <b>catalog number</b> |
|--------------------|---------------------|---------------|---------------------|-----------------------|
| CD38               | FITC                | multi-epitope | Cytognos            | #70-38F2              |
| CD138              | PE                  | 44F9          | Miltenyi Biotec     | #130119840            |
| CD319              | APC                 | 162.1         | BioLegend           | #331809               |
| CD269              | PE/Cy7              | 19F2          | BioLegend           | #357508               |
| DAPI               | DAPI                | -             | Sigma Aldrich       | #D9542                |
