# Supplementary material
Source: PubMed Central journal article supplement (PMC8639639)
Supplement: NIHMS1740893-supplement-2.pdf [file NIHMS1740893-supplement-2.pdf]

**Table S2. Antibodies used for Western Blot experiments**

|                             | <b>target</b> | <b>source</b>  | <b>dilution</b> | <b>manufacturer</b>       | <b>catalog number</b> |
|-----------------------------|---------------|----------------|-----------------|---------------------------|-----------------------|
| <b>primary antibodies</b>   | pERK1/2       | rabbit         | 1:1000          | Cell Signaling Technology | #9101L                |
|                             | tERK1/2       | mouse          | 1:1000          | Cell Signaling Technology | #4696S                |
|                             | pMEK1/2       | rabbit         | 1:1000          | Cell Signaling Technology | #9121S                |
|                             | MEK1/2        | rabbit         | 1:1000          | Cell Signaling Technology | #9122S                |
|                             | GADPH         | mouse          | 1:5000          | Cell Signaling Technology | #G8795                |
| <b>secondary antibodies</b> | mouse         | IgG HRP-linked | 1:5000          | Cell Signaling Technology | #7076S                |
|                             | rabbit        | IgG HRP-linked | 1:5000          | Cell Signaling Technology | #7074P2               |
