# Supplementary material
Source: PubMed Central journal article supplement (PMC8639639)

# Supplementary Figure 8

## Clone A

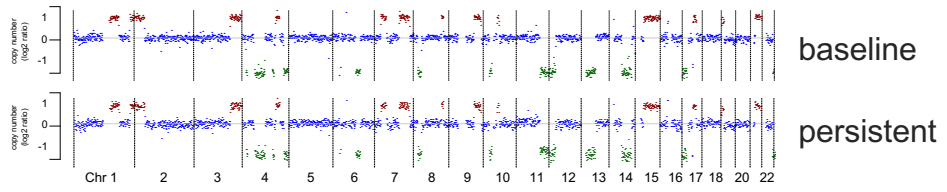

## Clone C

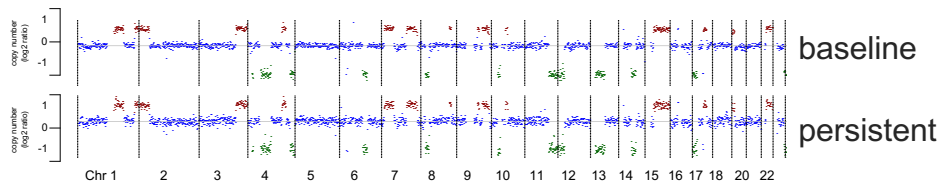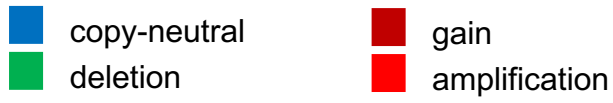

Supplement: NIHMS1740893-supplement-10.pdf [file NIHMS1740893-supplement-10.pdf]

Supplementary Figure 9

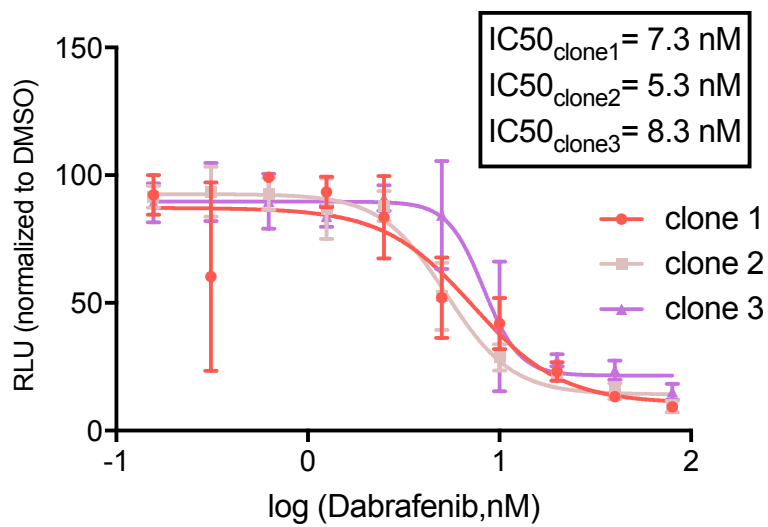

Supplement: NIHMS1740893-supplement-11.pdf [file NIHMS1740893-supplement-11.pdf]

Supplementary Figure 10

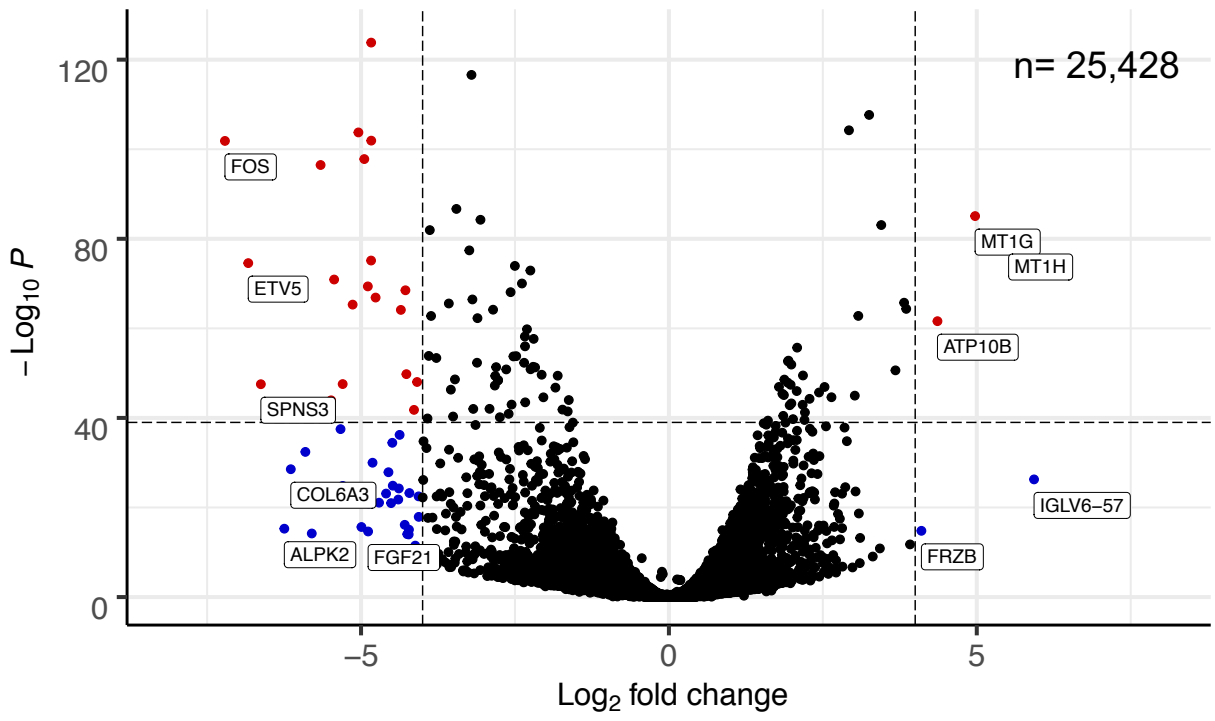

Supplement: NIHMS1740893-supplement-12.pdf [file NIHMS1740893-supplement-12.pdf]

Supplementary Figure 11

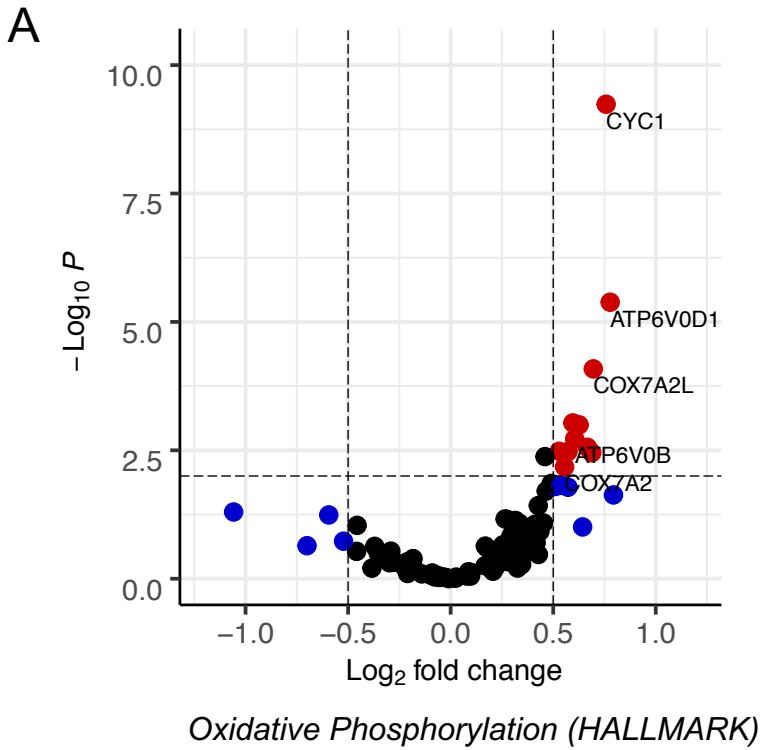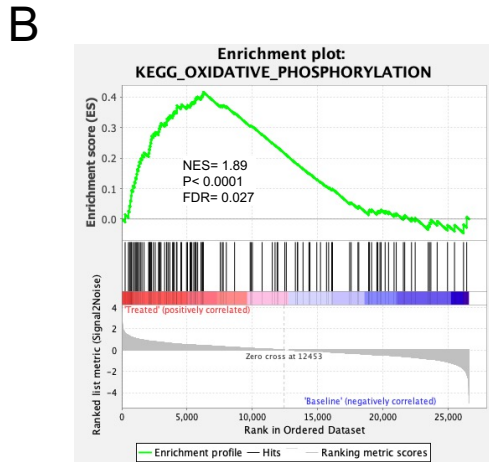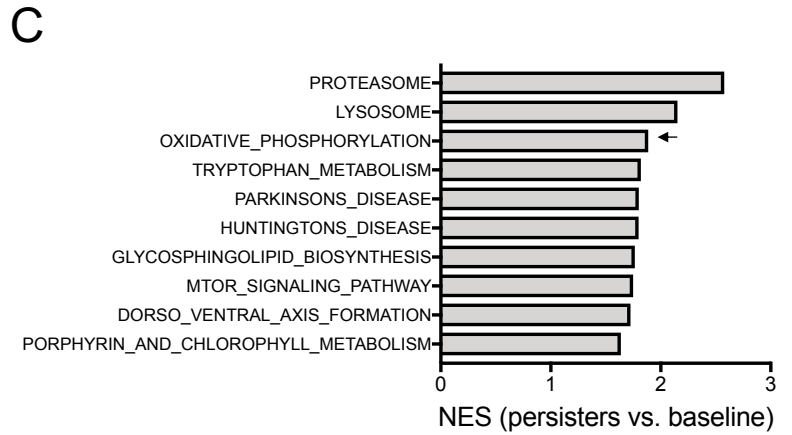

Supplement: NIHMS1740893-supplement-13.pdf [file NIHMS1740893-supplement-13.pdf]

Supplementary Figure 12

A

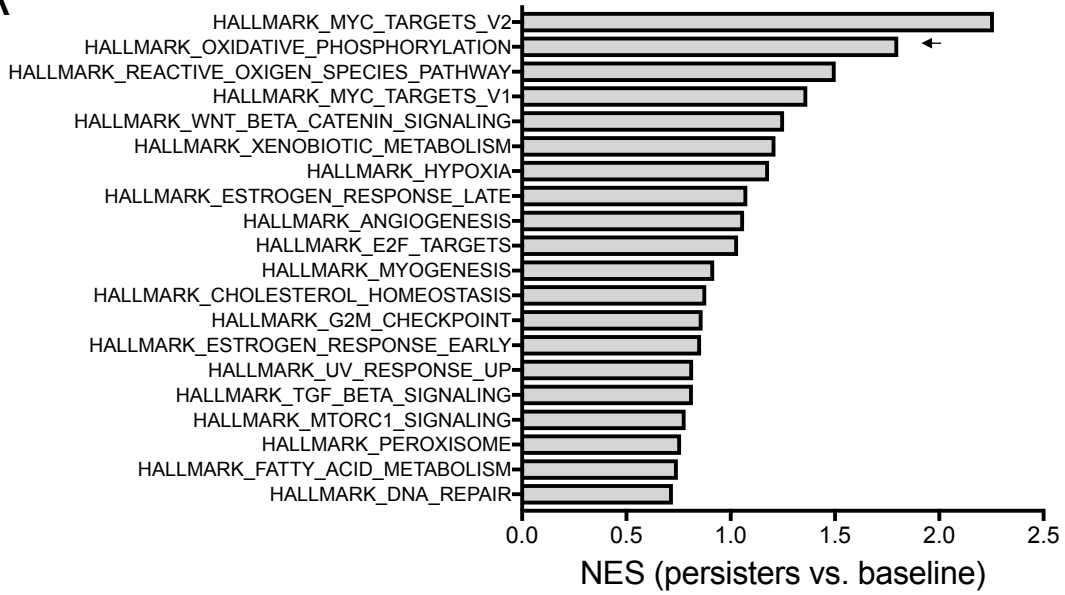

B

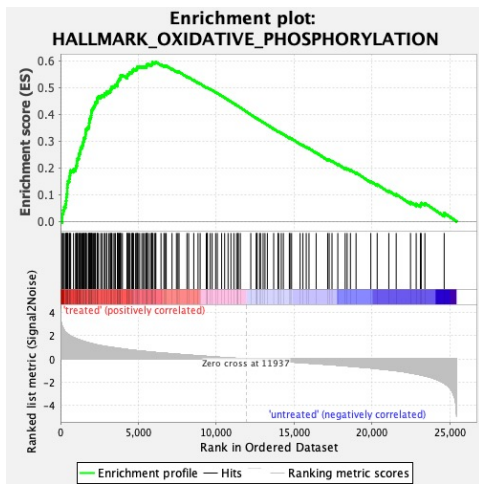

C

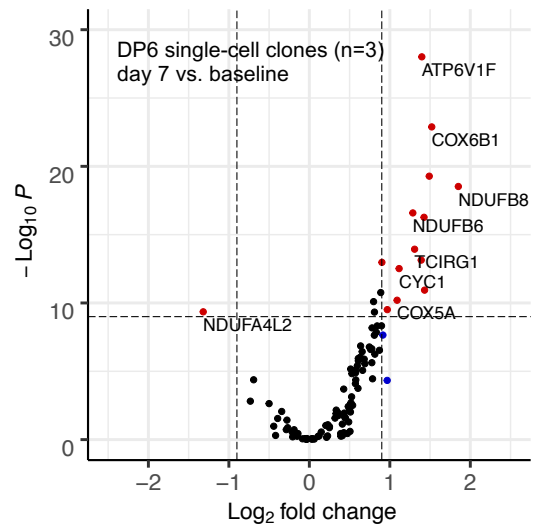

Supplement: NIHMS1740893-supplement-14.pdf [file NIHMS1740893-supplement-14.pdf]

Supplementary Figure 13

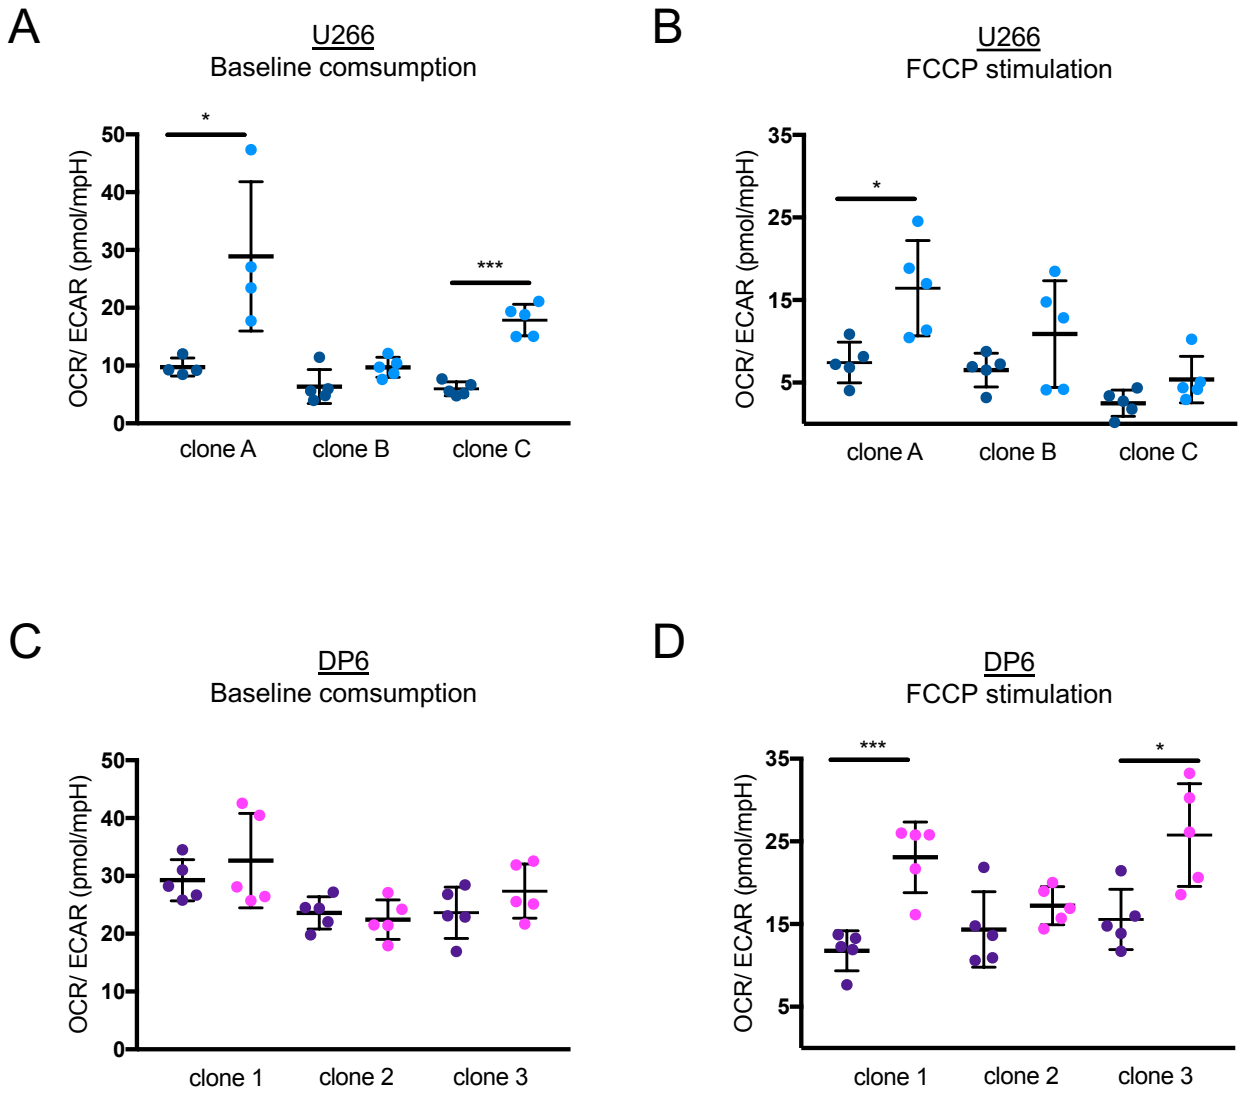

Supplement: NIHMS1740893-supplement-15.pdf [file NIHMS1740893-supplement-15.pdf]

## Supplementary Figure 14

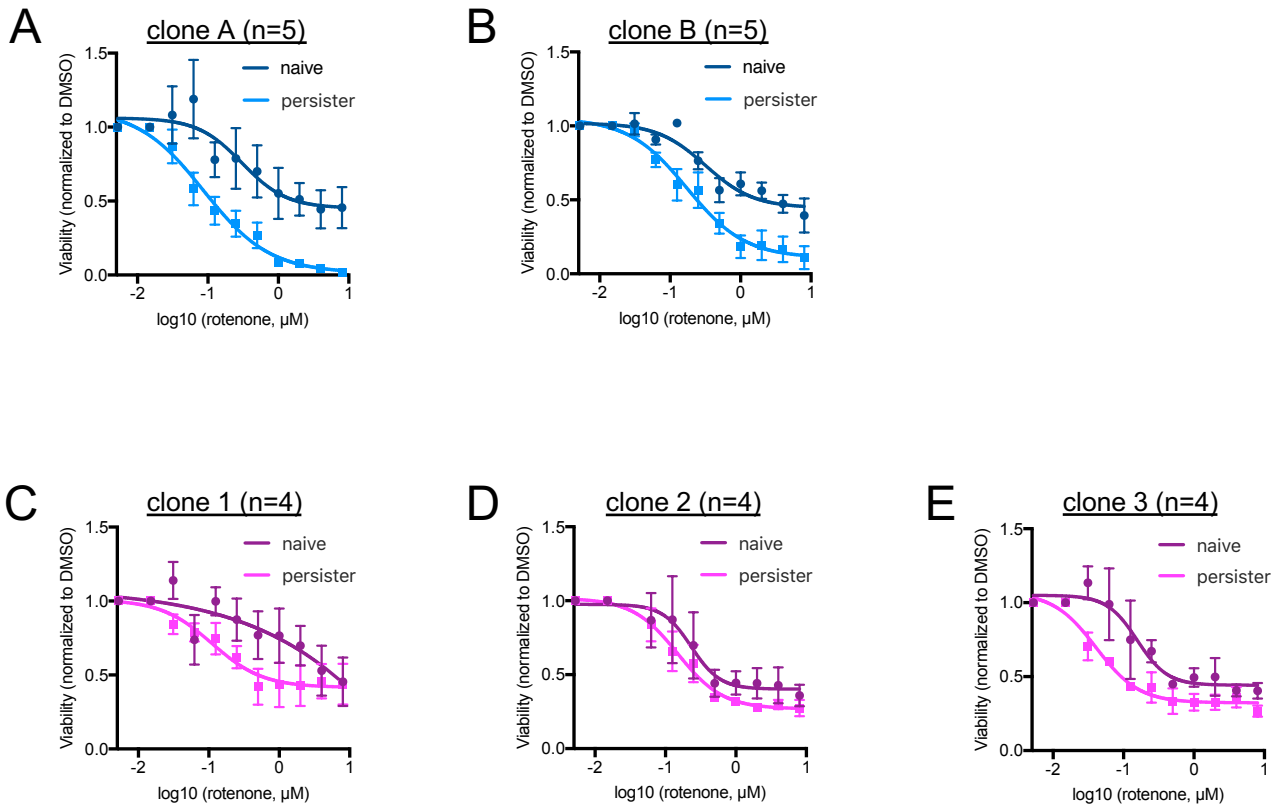

Supplement: NIHMS1740893-supplement-16.pdf [file NIHMS1740893-supplement-16.pdf]

## Supplementary Figure 15

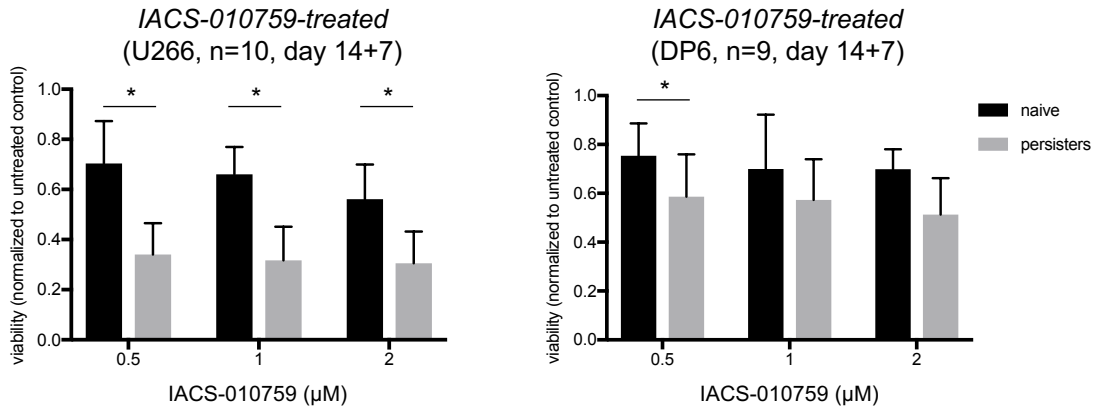

Supplement: NIHMS1740893-supplement-17.pdf [file NIHMS1740893-supplement-17.pdf]

Supplementary Figure 1

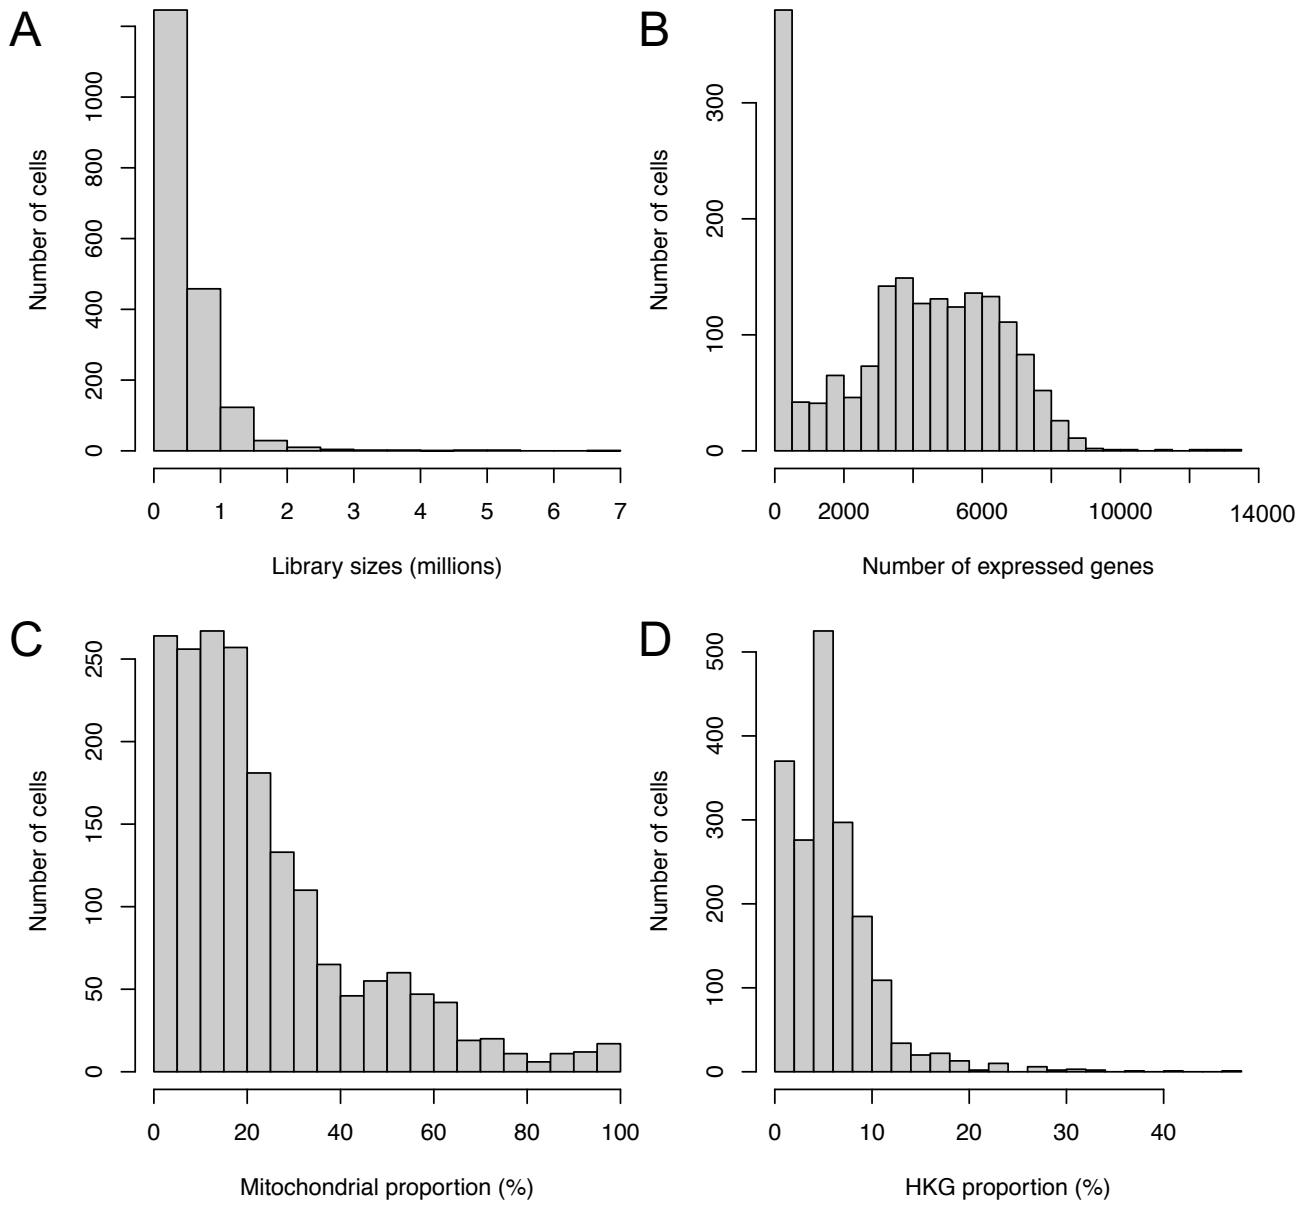

Supplement: NIHMS1740893-supplement-3.pdf [file NIHMS1740893-supplement-3.pdf]

Supplementary Figure 2

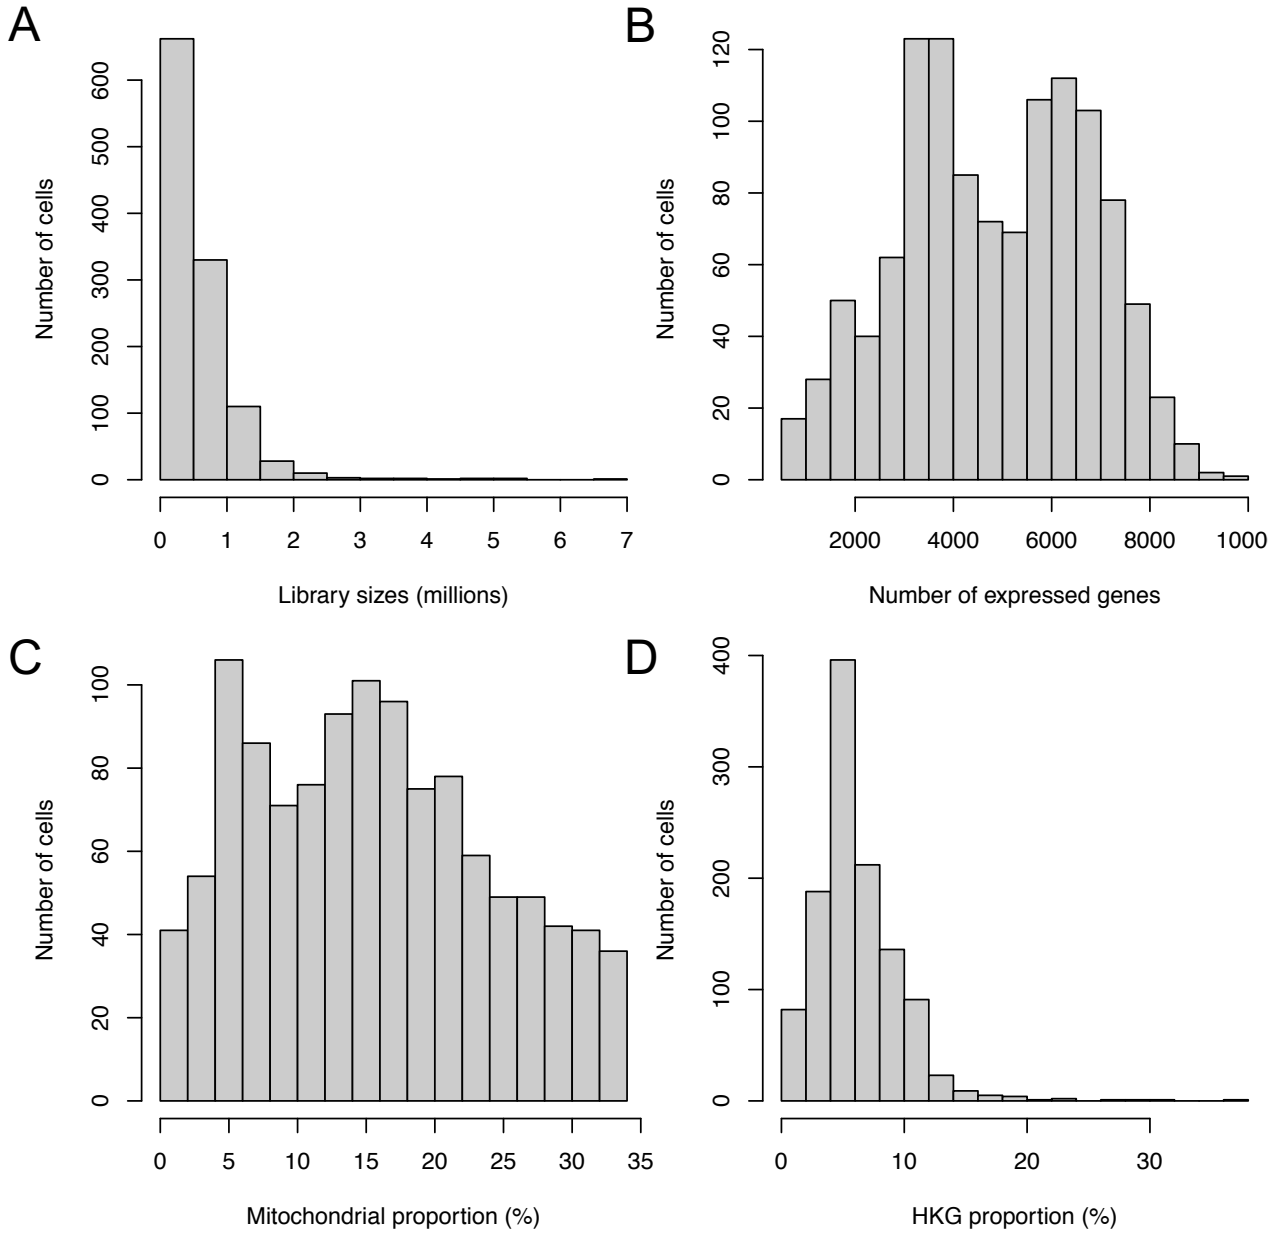

Supplement: NIHMS1740893-supplement-4.pdf [file NIHMS1740893-supplement-4.pdf]

Supplementary Figure 3

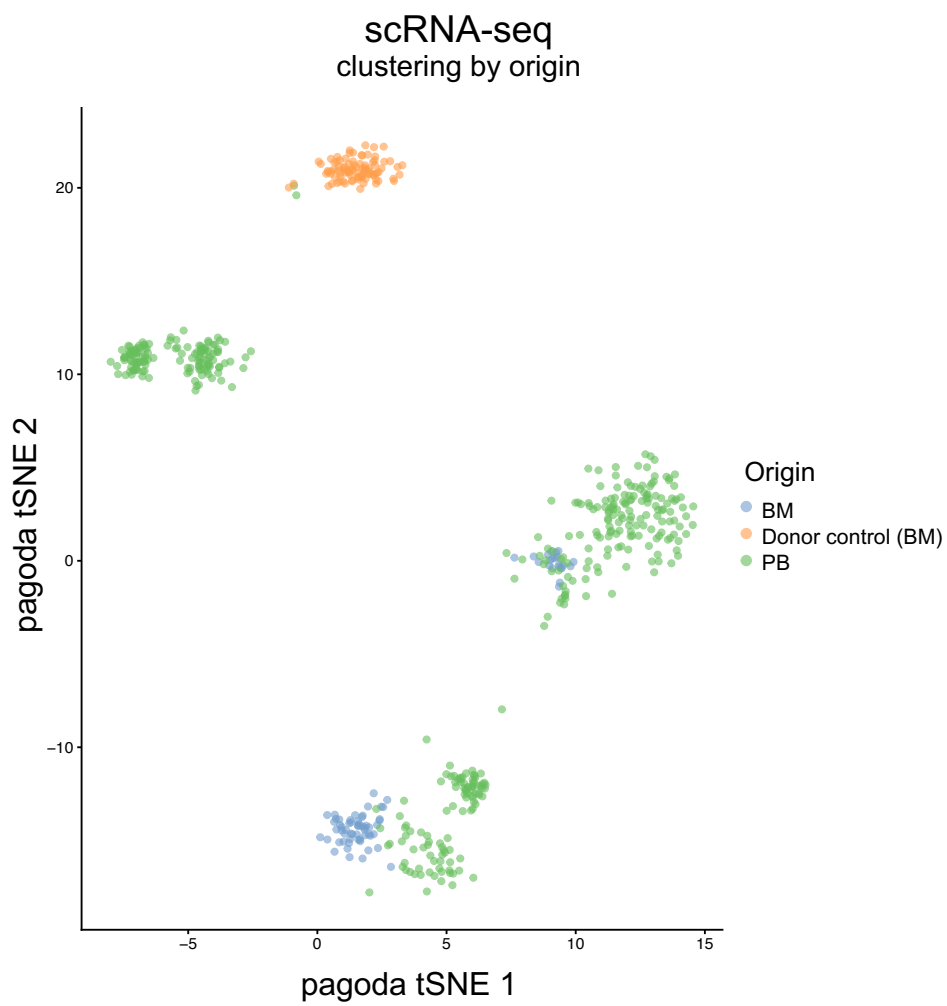

Supplement: NIHMS1740893-supplement-5.pdf [file NIHMS1740893-supplement-5.pdf]

## Supplementary Figure 4

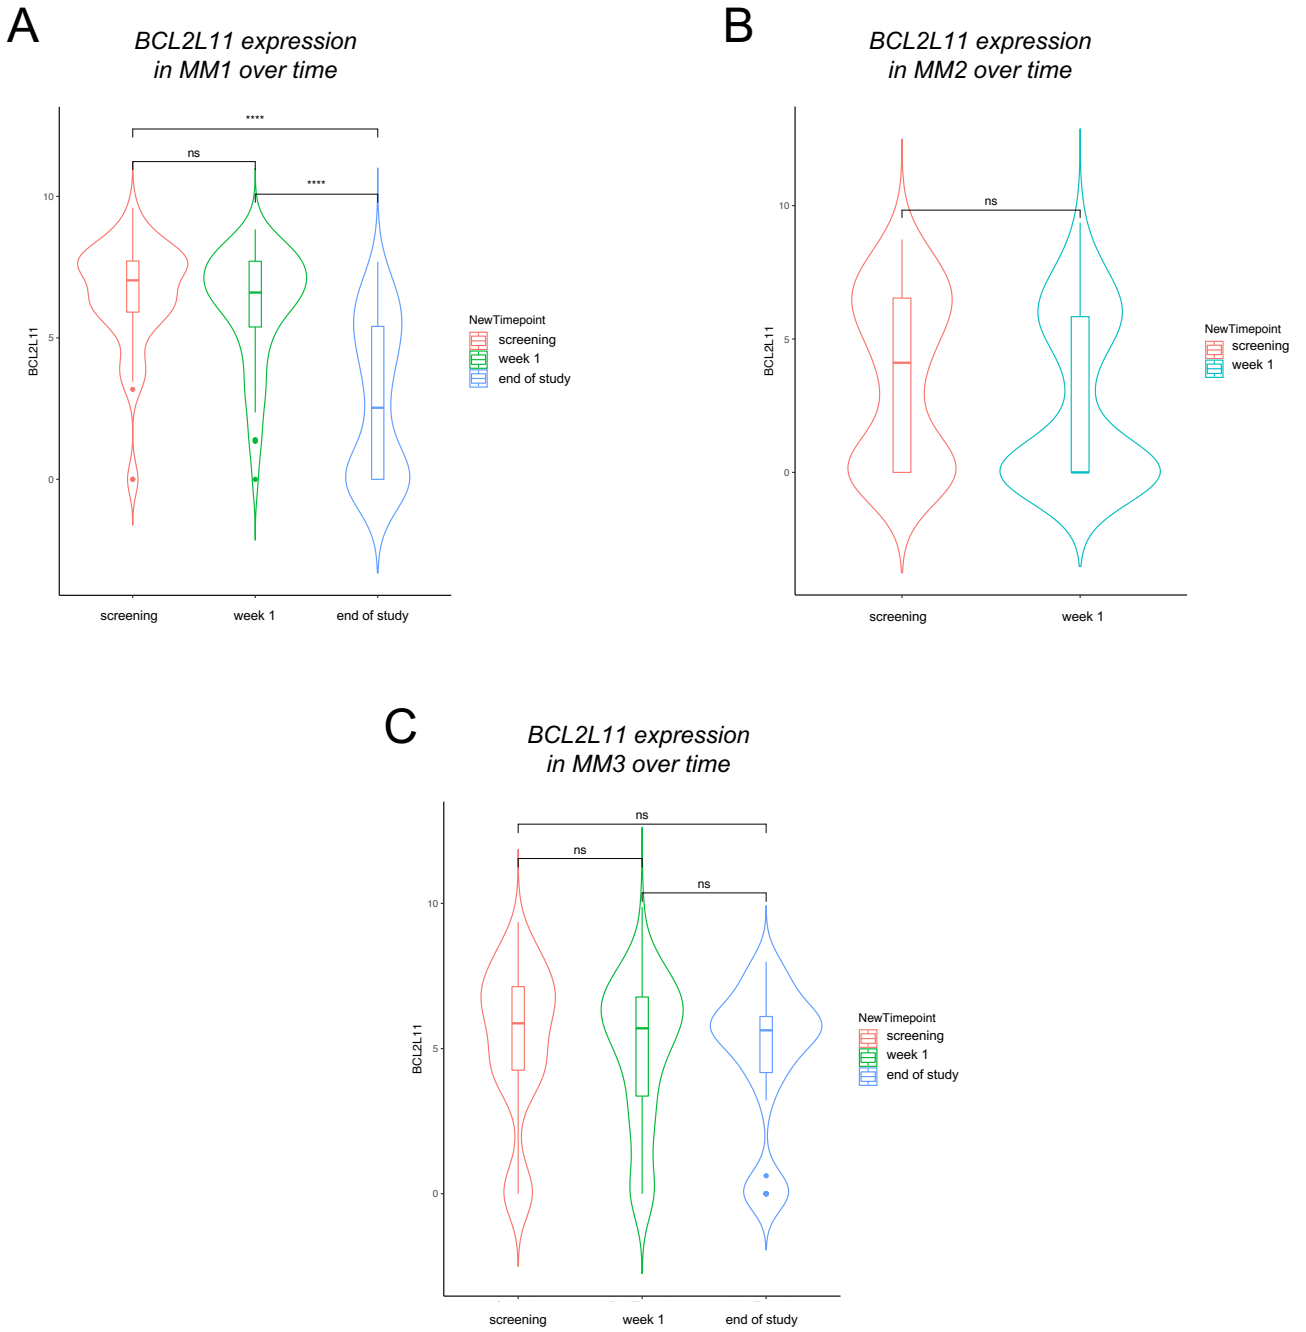

Supplement: NIHMS1740893-supplement-6.pdf [file NIHMS1740893-supplement-6.pdf]

Supplementary Figure 5

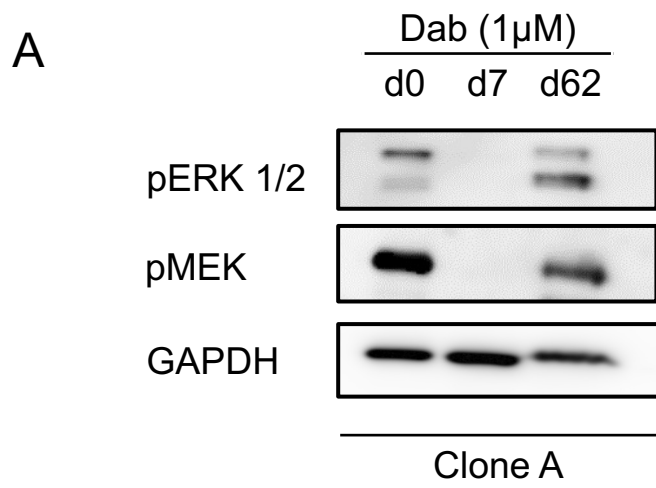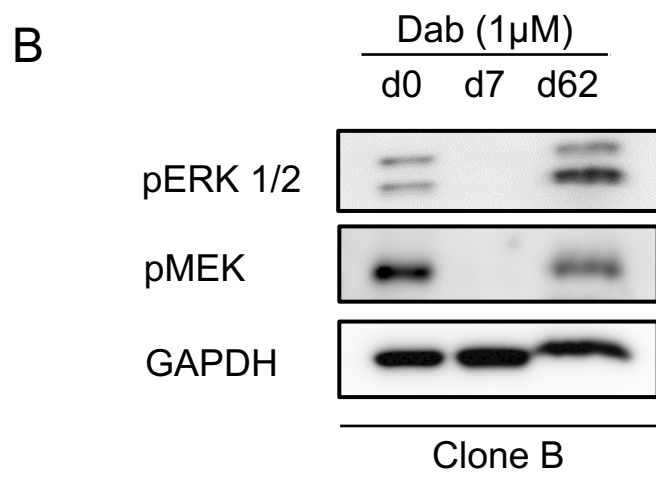

Supplement: NIHMS1740893-supplement-7.pdf [file NIHMS1740893-supplement-7.pdf]

Supplementary Figure 6

A

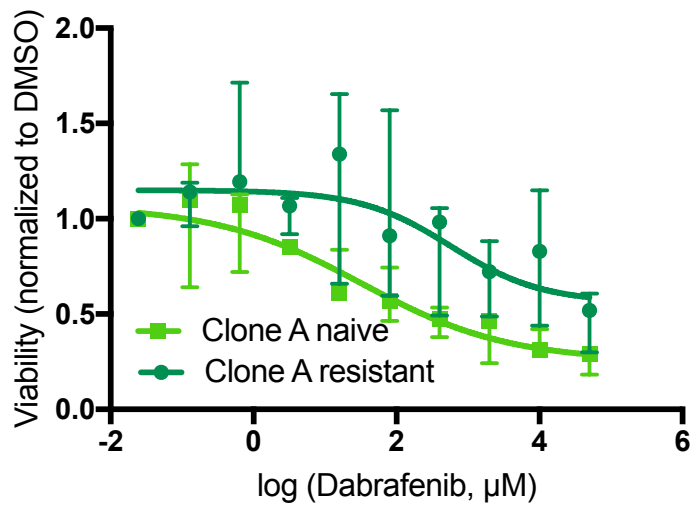

B

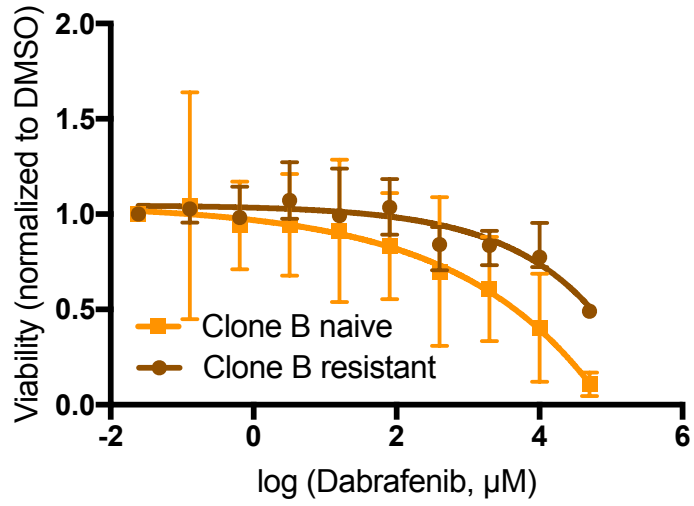

Supplement: NIHMS1740893-supplement-8.pdf [file NIHMS1740893-supplement-8.pdf]

## Supplementary Figure 7

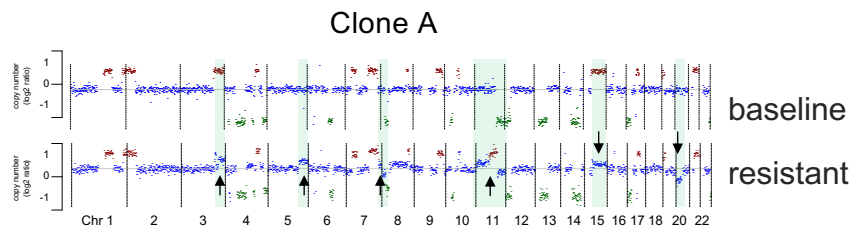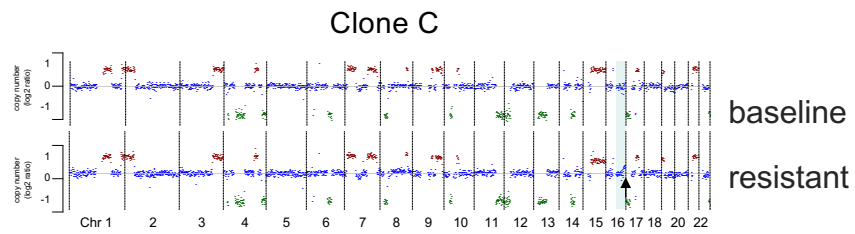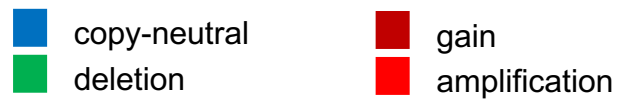

Supplement: NIHMS1740893-supplement-9.pdf [file NIHMS1740893-supplement-9.pdf]
